# Supplementary material
Source: PubMed Central journal article supplement (PMC3890807)
Supplement: 1308768111_pnas.201308768SI.pdf [file 1308768111_pnas.201308768SI.pdf]

# Supporting Information

Kang et al. 10.1073/pnas.1308768111

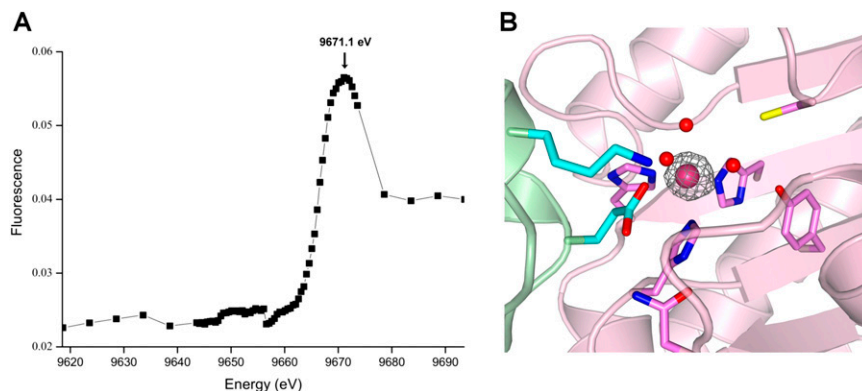

**Fig. S1.** Presence of a zinc ion in the active site. (A) X-ray fluorescence spectrum of 5-methylthioribulose-1-phosphate dehydratase/Apaf-1 interacting protein (MtnB/APIP) crystal around a zinc absorption edge. (B) Anomalous difference map is contoured at the level of  $5\sigma$  cutoff. The diffraction data are collected at the wavelength corresponding to the peak in A, 1.28201 Å. The view is same as in Fig. 3A.

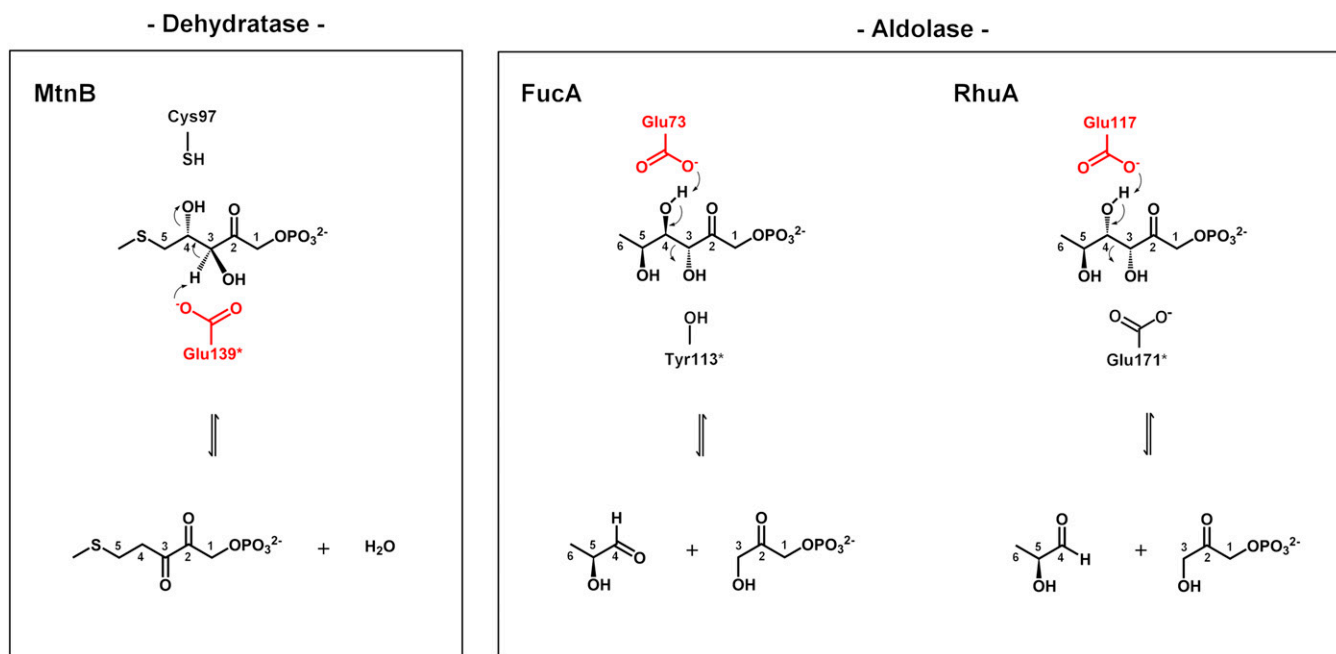

**Fig. S2.** Biochemical features of APIP/MtnB as a dehydratase contrasting to aldolases such as FucA and RhuA. Dehydration reaction by APIP/MtnB does not involve C-C bond cleavage, which is characteristic of the aldolase reactions. The catalytic acid/base residue of APIP/MtnB is located at the opposite side of the substrate in comparison with aldolases; Glu139\* of APIP/MtnB is located at the C3-side of the substrate, but Glu73 of FucA and Glu117 of RhuA commonly at the C4-side of the corresponding substrates. Connectedly, the initial proton abstraction occurs at C3 in APIP/MtnB's dehydratase reaction, but it occurs, in contrast, at O4 in aldolase reactions by FucA and RhuA.

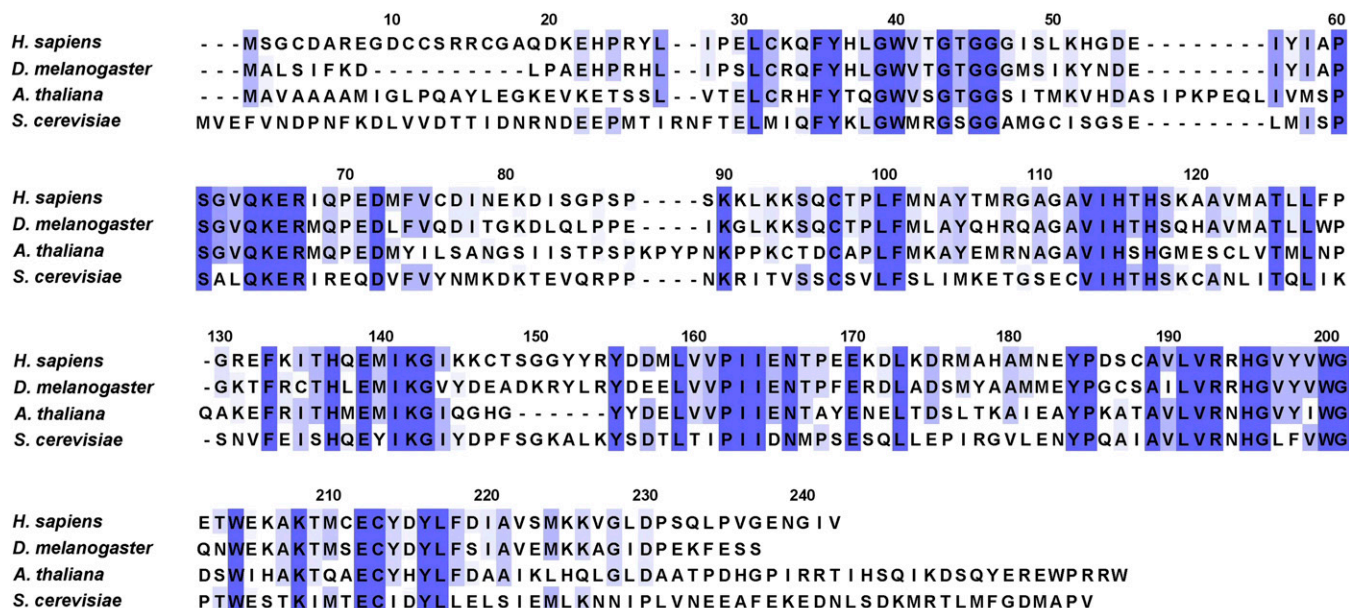

Fig. S3. Sequence conservation of APiP/MtnB through multicellular organisms. APiP/MtnB sequences from four multicellular organisms are aligned. Conserved residues are boxed in blue.

Table S1. Summary of structure determination and refinement

| Data collection                                              |                                     |                   |                   |                   |                     |
|--------------------------------------------------------------|-------------------------------------|-------------------|-------------------|-------------------|---------------------|
| Data set                                                     | Br soaked                           |                   |                   | Native            |                     |
| Space group                                                  | C22 <sub>1</sub>                    |                   |                   | C22 <sub>1</sub>  |                     |
| Wavelength, Å                                                | Edge, 0.91977                       | Peak, 0.91957     | Remote, 0.90633   | 1.00000           | 1.28201 (zinc edge) |
| Unit cell, Å                                                 | <i>a</i> = 106.81                   | <i>a</i> = 106.78 | <i>a</i> = 106.83 | <i>a</i> = 107.04 | <i>a</i> = 107.10   |
|                                                              | <i>b</i> = 107.29                   | <i>b</i> = 107.27 | <i>b</i> = 107.30 | <i>b</i> = 107.74 | <i>b</i> = 107.76   |
|                                                              | <i>c</i> = 191.06                   | <i>c</i> = 191.00 | <i>c</i> = 191.09 | <i>c</i> = 192.10 | <i>c</i> = 190.92   |
| Resolution, Å                                                | 30.00–2.20                          | 30.00–2.20        | 30.00–2.20        | 50.00–2.00        | 30.00–2.30          |
| Reflections, total/unique                                    | 658,243/54,020                      | 655,403/53,922    | 659,382/54,053    | 458,706/72,069    | 528,270/46,689      |
| Completeness, %                                              | 95.8 (75.3)                         | 95.7 (74.6)       | 95.7 (74.8)       | 96.0 (81.2)       | 95.0 (93.1)         |
| <i>R</i> <sub>merge</sub> , %                                | 4.8 (16.9)                          | 4.3 (15.7)        | 4.8 (17.1)        | 6.4 (37.8)        | 13.6 (25.5)         |
| Redundancy                                                   | 12.2 (6.7)                          | 12.2 (6.7)        | 12.2 (6.5)        | 6.4 (5.0)         | 11.3 (11.4)         |
| < <i>I</i> >/<σ( <i>I</i> )>                                 | 64.6 (13.1)                         | 63.7 (13.0)       | 62.7 (12.4)       | 31.2 (4.1)        | 13.9 (7.4)          |
| Phasing                                                      |                                     |                   |                   |                   |                     |
| Br sites                                                     | 10                                  |                   |                   |                   |                     |
| Figure of merit                                              | 0.405 from SOLVE/0.709 from RESOLVE |                   |                   |                   |                     |
| Model refinement                                             |                                     |                   |                   |                   |                     |
| <i>R</i> <sub>work</sub> / <i>R</i> <sub>free</sub> , %      |                                     |                   |                   | 18.3/22.0         | 15.6/19.8           |
| RMS deviation in bond lengths/angles, Å/°                    |                                     |                   |                   | 0.026/2.049       | 0.019/2.011         |
| Number of nonhydrogen atoms/average B-factor, Å <sup>2</sup> |                                     |                   |                   |                   |                     |
| Protein (893 residues for four subunits)                     |                                     |                   |                   | 7053/30.0         | 7053/31.7           |
| Zinc                                                         |                                     |                   |                   | 4/18.9            | 4/26.4              |
| Water                                                        |                                     |                   |                   | 567/37.1          | 567/37.9            |
| Ramachandran plot, no. of residues (%)                       |                                     |                   |                   |                   |                     |
| In preferred region                                          |                                     |                   |                   | 857 (96.84)       | 844 (95.37)         |
| In allowed region                                            |                                     |                   |                   | 25 (2.82)         | 35 (3.95)           |
| Outliers                                                     |                                     |                   |                   | 3 (0.34)          | 6 (0.68)            |

Values in parentheses are for the highest-resolution shell; 2.24–2.20 Å for Br-MAD data sets, 2.07–2.00 Å for the native data set at 1.00000 Å, and 2.42–2.30 Å for the native data set at 1.28201 Å.
